# Supplementary material for: Preclinical Evaluation of the Safety and Efficacy of Cryopreserved Bone Marrow Mesenchymal Stromal Cells for Corneal Repair
Source: PubMed Central journal article supplement — Transl Vis Sci Technol. 2021 Aug 12;10(10):3. doi: 10.1167/tvst.10.10.3 (PMC8362636; doi:10.1167/tvst.10.10.3), 2021-08-12
Supplement: tvst-10-10-3_s001.pdf [file tvst-10-10-3_s001.pdf]

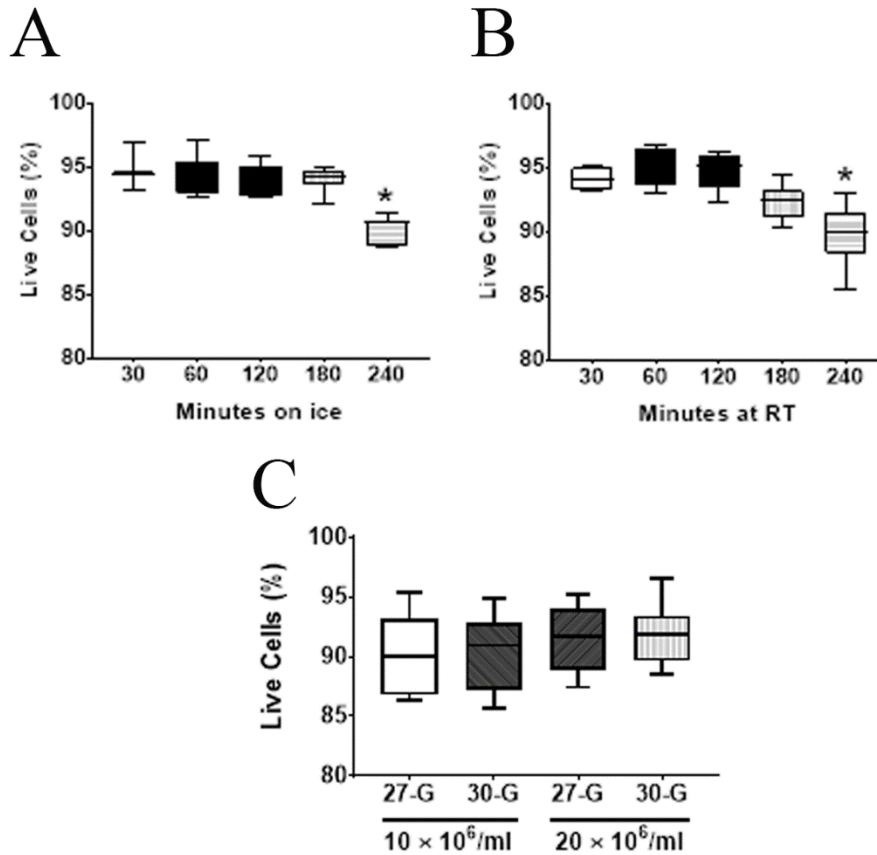

**Figure S1. Viability of human MSCs after thawing.** (A) Viability of freshly thawed human MSCs was tested on ice in different time points. No significant difference was observed in viability up to 180 minutes after thawing. However, there was a significant drop in their viability 240 minutes. (B) Viability of freshly thawed MSCs kept at room temperature showed no significant difference up to 180 minutes after thawing, but a significant drop in their viability at 240 minutes. (C) Two different concentrations of cryopreserved MSCs ( $1 \times 10^7/\text{ml}$  and  $2 \times 10^7/\text{ml}$ ) were thawed and passed through 27- and 30-gauge needles to assess differences in viability. No significant differences in viability was observed between two groups.

Boxes show the interquartile (25%–75%) range, whiskers encompass the range (minimum–maximum), and horizontal lines represent the mean. Data shown are representative of three independent experiments. G: gauge; RT: room temperature. \*  $P < 0.001$
