# Supplementary material for: Preclinical Evaluation of the Safety and Efficacy of Cryopreserved Bone Marrow Mesenchymal Stromal Cells for Corneal Repair
Source: PubMed Central journal article supplement — Transl Vis Sci Technol. 2021 Aug 12;10(10):3. doi: 10.1167/tvst.10.10.3 (PMC8362636; doi:10.1167/tvst.10.10.3), 2021-08-12
Supplement: tvst-10-10-3_s002.pdf [file tvst-10-10-3_s002.pdf]

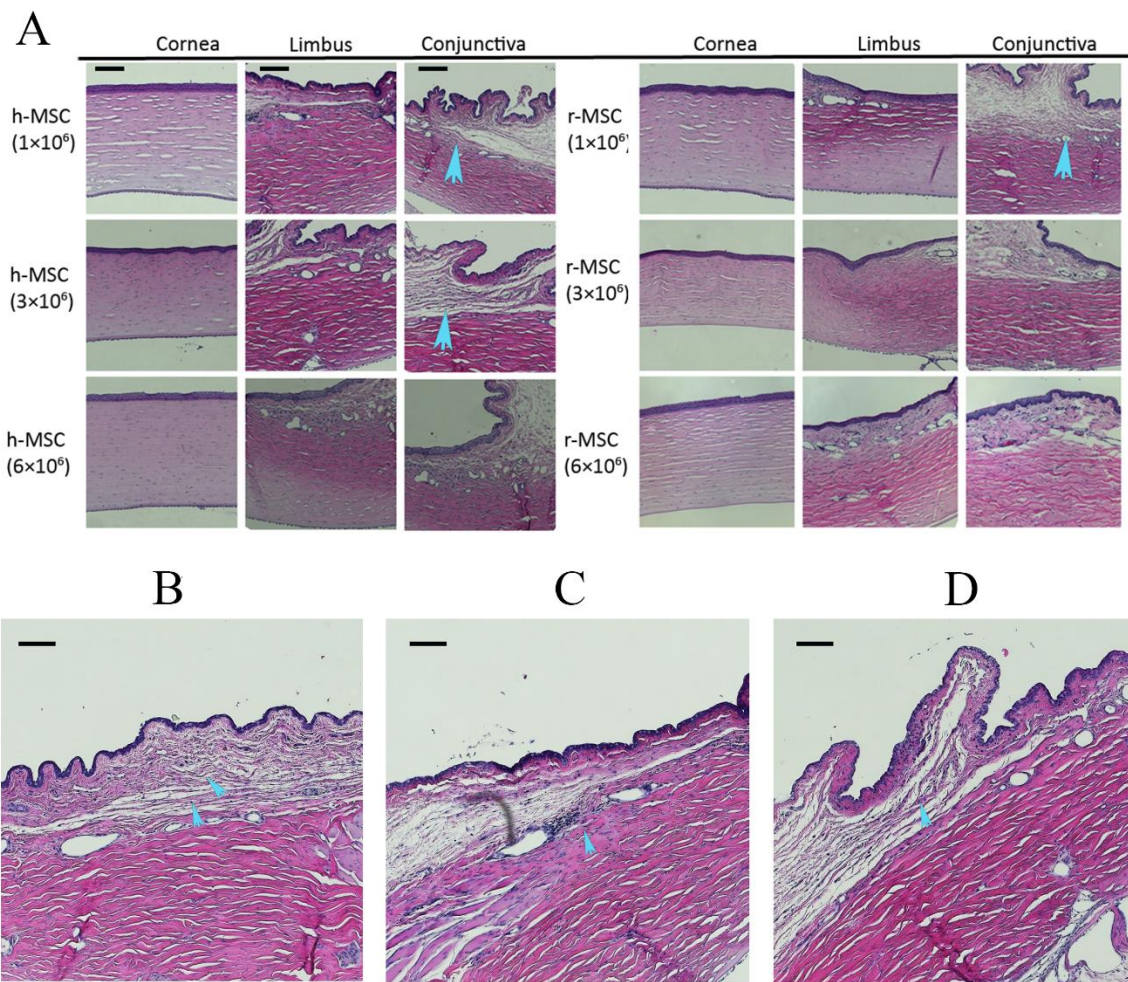

**Figure S2. Histopathology of rabbit eyes injected with MSCs.**

(A) Histopathology of rabbit eyes at 12 weeks after subconjunctival injection with different doses of human or rabbit MSCs. There are no signs of ocular toxicity. Normal structure of the cornea and limbus are visible, with some inflammatory cells in the conjunctiva in some human and rabbit MSCs treated group (arrows). h-MSC: human MSC; r-MSC: rabbit MSC. Scale bars: 100  $\mu$ m. (B-D) Representative images of histopathology summary table in rabbit eyes after subconjunctival injection of human or rabbit MSCs at 20x magnification. Inflammatory cells were present in conjunctival area (arrows) in (B)  $1 \times 10^6$  r-MSC, (C)  $1 \times 10^6$ , and (D)  $3 \times 10^6$  h-MSC treated group. Scale bars: 100  $\mu$ m.
