# Supplementary material for: Preclinical Evaluation of the Safety and Efficacy of Cryopreserved Bone Marrow Mesenchymal Stromal Cells for Corneal Repair
Source: PubMed Central journal article supplement — Transl Vis Sci Technol. 2021 Aug 12;10(10):3. doi: 10.1167/tvst.10.10.3 (PMC8362636; doi:10.1167/tvst.10.10.3), 2021-08-12
Supplement: tvst-10-10-3_s003.pdf [file tvst-10-10-3_s003.pdf]

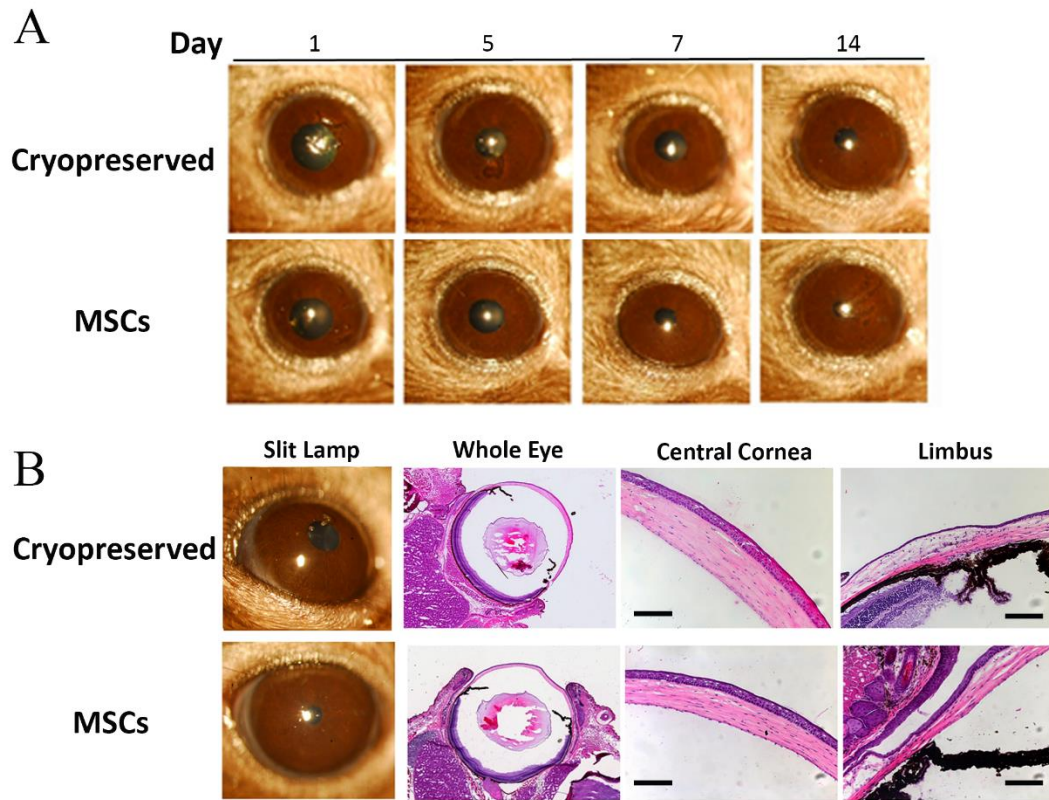

**Figure S3. Subconjunctival injection of human BM-MSCs or cryopreserved media into uninjured mice cornea.**

(A) Cryopreserved media or human bone marrow derived MSCs were injected subconjunctivally in unwounded mice cornea and were followed up to 14 days to evaluate the safety. There was no sign of infection, cornea neovascularization, scarring and haziness. (B) Histopathology of the mice eyes at 14 days after subconjunctival injection showed normal structure of the cornea and limbus. Scale bars: 100  $\mu$ m.
